# Supplementary material for: Undermining Glutaminolysis Bolsters Chemotherapy While NRF2 Promotes Chemoresistance in KRAS-Driven Pancreatic Cancers
Source: Oxford University Press journal article supplement (doi:10.1158/0008-5472.can-19-1363), 2020-01-07
Supplement: 00085472can191363-sup-221481_3_supp_5990844_q3bd9g.docx [file 00085472can191363-sup-221481_3_supp_5990844_q3bd9g.docx]

| **Position** | **Sex** | **Age** | **Organ** | **Pathology** | **Grade** | **TNM** | **Stage** | **Type** | **Staining Intensity** |
| --- | --- | --- | --- | --- | --- | --- | --- | --- | --- |
| A1 | M | 56 | Pancreas | Duct Adenocarcinoma | 1 | T2N0M0 | I | Malignant | 2 |
| A2 | M | 77 | Pancreas | Duct Adenocarcinoma | 1 | T2N0M0 | I | Malignant | 2 |
| A3 | F | 51 | Pancreas | Duct Adenocarcinoma | 1 | T3N0M0 | II | Malignant | 1 |
| A4 | F | 38 | Pancreas | Duct Adenocarcinoma (Blank) | - | T3N1M0 | III | Malignant | * |
| A5 | F | 51 | Pancreas | Duct Adenocarcinoma | 2 | T3N0M0 | II | Malignant | 1 |
| A6 | M | 58 | Pancreas | Duct Adenocarcinoma (Blank) | - | T2N0M0 | I | Malignant | * |
| A7 | F | 54 | Pancreas | Duct Adenocarcinoma | 2 | T3N0M0 | II | Malignant | 1 |
| A8 | F | 51 | Pancreas | Duct Adenocarcinoma (Sparse) | - | T3N0M0 | II | Malignant | 2 |
| A9 | F | 75 | Pancreas | Duct Adenocarcinoma | - | T3N0M1 | IV | Malignant | 1 |
| A10 | M | 56 | Pancreas | Duct Adenocarcinoma | 1 | T2N1M0 | III | Malignant | 2 |
| B1 | F | 42 | Pancreas | Duct Adenocarcinoma | 1 | T3N0M0 | II | Malignant | 1 |
| B2 | F | 57 | Pancreas | Duct Adenocarcinoma (Pancreas Tissue) | - | T3N0M0 | II | Malignant | 0 |
| B3 | M | 31 | Pancreas | Duct Adenocarcinoma(Sparse) | 1 | T3N0M0 | II | Malignant | 1 |
| B4 | F | 76 | Pancreas | Duct Adenocarcinoma | 2 | T3N0M0 | II | Malignant | 2 |
| B5 | M | 64 | Pancreas | Duct Adenocarcinoma | 3 | T3N0M0 | II | Malignant | 1 |
| B6 | F | 54 | Pancreas | Duct Adenocarcinoma | 2 | T2N0M0 | I | Malignant | 2 |
| B7 | M | 60 | Pancreas | Duct Adenocarcinoma | 1 | T3N0M0 | II | Malignant | 1 |
| B8 | F | 64 | Pancreas | Duct Adenocarcinoma (Sparse) | 1 | T2N0M0 | I | Malignant | 1 |
| B9 | M | 64 | Pancreas | Duct Adenocarcinoma | 2 | T2N0M0 | II | Malignant | 2 |
| B10 | F | 68 | Pancreas | Duct Adenocarcinoma | 2 | T2N0M0 | I | Malignant | 2 |
| C1 | M | 65 | Pancreas | Duct Adenocarcinoma | 1 | T3N0M0 | II | Malignant | 1 |
| C2 | F | 48 | Pancreas | Duct Adenocarcinoma | 2 | T3N0M0 | II | Malignant | 2 |
| C3 | F | 76 | Pancreas | Duct Adenocarcinoma | 2 | T3N0M0 | II | Malignant | 1 |
| C4 | M | 57 | Pancreas | Duct Adenocarcinoma (Sparse) | 1 | T3N0M0 | II | Malignant | 1 |
| C5 | M | 59 | Pancreas | Duct Adenocarcinoma | 2 | T3N0M0 | II | Malignant | 1 |
| C6 | M | 49 | Pancreas | Duct Adenocarcinoma (Sparse) | 1 | T3N0M0 | II | Malignant | 1 |
| C7 | M | 39 | Pancreas | Duct Adenocarcinoma | 2 | T3N0M0 | II | Malignant | 3 |
| C8 | M | 44 | Pancreas | Duct Adenocarcinoma | 2 | T3N0M0 | II | Malignant | 2 |
| C9 | M | 50 | Pancreas | Duct Adenocarcinoma (Sparse) | 1 | T2N1M0 | III | Malignant | 2 |
| C10 | M | 64 | Pancreas | Duct Adenocarcinoma | 2 | T3N0M0 | II | Malignant | 1 |
| D1 | M | 41 | Pancreas | Duct Adenocarcinoma | 3 | T4N1M0 | III | Malignant | 2 |
| D2 | F | 71 | Pancreas | Duct Adenocarcinoma | 2 | T2N0M0 | I | Malignant | 2 |
| D3 | F | 44 | Pancreas | Duct Adenocarcinoma | 3 | T2N0M0 | I | Malignant | 1 |
| D4 | M | 55 | Pancreas | Duct Adenocarcinoma (Sparse) | 2 | T3N0M0 | II | Malignant | 1 |
| D5 | F | 46 | Pancreas | Duct Adenocarcinoma | 2 | T2N0M0 | I | Malignant | 0 |
| D6 | M | 52 | Pancreas | Duct Adenocarcinoma | 2 | T1N0M0 | I | Malignant | 2 |
| D7 | F | 47 | Pancreas | Duct Adenocarcinoma | 3 | T3N1M0 | III | Malignant | 2 |
| D8 | F | 62 | Pancreas | Duct Adenocarcinoma | 3 | T3N1M0 | III | Malignant | 0 |
| D9 | M | 56 | Pancreas | Duct Adenocarcinoma | 3 | T2N1bM0 | III | Malignant | 0 |
| D10 | M | 60 | Pancreas | Duct Adenocarcinoma | 2 | T3N0M0 | II | Malignant | 2 |
| E1 | F | 58 | Pancreas | Duct Adenocarcinoma | 2 | T3N1M0 | III | Malignant | 1 |
| E2 | M | 52 | Pancreas | Duct Adenocarcinoma | 3 | T2N0M0 | I | Malignant | 2 |
| E3 | F | 63 | Pancreas | Duct Adenocarcinoma | 3 | T2N0M0 | I | Malignant | 3 |
| E4 | M | 51 | Pancreas | Duct Adenocarcinoma | 3 | T3N0M0 | II | Malignant | 2 |
| E5 | F | 48 | Pancreas | Duct Adenocarcinoma | 3 | T3N0M0 | II | Malignant | 1 |
| E6 | M | 78 | Pancreas | Duct Adenocarcinoma (Sparse) | 3 | T2N0M0 | I | Malignant | 1 |
| E7 | M | 65 | Pancreas | Duct Adenocarcinoma | 3 | T2N0M0 | I | Malignant | 3 |
| E8 | F | 68 | Pancreas | Duct Adenocarcinoma | 3 | T3N0M0 | II | Malignant | 2 |
| E9 | F | 53 | Pancreas | Duct Adenocarcinoma (Blank) | 3 | T2N0M0 | I | Malignant | * |
| E10 | M | 60 | Pancreas | Duct Adenocarcinoma | 3 | T2N1M0 | III | Malignant | 1 |
| F1 | F | 62 | Pancreas | Duct Adenocarcinoma | 3 | T3N0M0 | II | Malignant | 3 |
| F2 | M | 56 | Pancreas | Duct Adenocarcinoma (Sparse) | - | T2N0M0 | I | Malignant | 3 |
| F3 | M | 45 | Pancreas | Duct Adenocarcinoma | 3 | T2N1M0 | III | Malignant | 2 |
| F4 | M | 59 | Pancreas | Duct Adenocarcinoma (Blank) | - | T3N0M0 | II | Malignant | * |
| F5 | M | 62 | Pancreas | Duct Adenocarcinoma | 3 | T3N0M0 | II | Malignant | 2 |
| F6 | M | 61 | Pancreas | Duct Adenocarcinoma | 2 | T3N0M1 | IV | Malignant | 3 |
| F7 | F | 51 | Pancreas | Duct Adenocarcinoma | 3 | T3N0M0 | II | Malignant | 3 |
| F8 | F | 51 | Pancreas | Duct Adenocarcinoma | 3 | T3N0M0 | II | Malignant | 3 |
| F9 | M | 45 | Pancreas | Acinic Cell Carcinoma (Blank) | - | T2N0M0 | I | Malignant | * |
| F10 | M | 62 | Pancreas | Squamous Cell Carcinoma | 2 | T3N0M0 | II | Malignant | 1 |
| G1 | M | 52 | Pancreas | Adjacent Normal Pancreas Tissue | - | - | - | NAT | 2 |
| G2 | F | 51 | Pancreas | Adjacent Normal Pancreas Tissue | - | - | - | NAT | 1 |
| G3 | M | 51 | Pancreas | Adjacent Normal Pancreas Tissue | - | - | - | NAT | 2 |
| G4 | F | 48 | Pancreas | Adjacent Normal Pancreas Tissue | - | - | - | NAT | 3 |
| G5 | M | 53 | Pancreas | Adjacent Normal Pancreas Tissue | - | - | - | NAT | 3 |
| G6 | M | 75 | Pancreas | Adjacent Normal Pancreas Tissue | - | - | - | NAT | 3 |
| G7 | F | 53 | Pancreas | Adjacent Normal Pancreas Tissue | - | - | - | NAT | 3 |
| G8 | M | 52 | Pancreas | Adjacent Normal Pancreas Tissue | - | - | - | NAT | 2 |
| G9 | M | 38 | Pancreas | Adjacent Normal Pancreas Tissue | - | - | - | NAT | 3 |
| G10 | M | 65 | Pancreas | Adjacent Normal Pancreas Tissue | - | - | - | NAT | 3 |
| H1 | M | 40 | Pancreas | Pancreas Tissue | - | - | - | Normal | 3 |
| H2 | M | 47 | Pancreas | Pancreas Tissue | - | - | - | Normal | 3 |
| H3 | M | 25 | Pancreas | Pancreas Tissue | - | - | - | Normal | 3 |
| H4 | M | 42 | Pancreas | Pancreas Tissue | - | - | - | Normal | 3 |
| H5 | M | 29 | Pancreas | Pancreas Tissue | - | - | - | Normal | 1 |
| H6 | M | 50 | Pancreas | Pancreas Tissue | - | - | - | Normal | 3 |
| H7 | M | 30 | Pancreas | Pancreas Tissue | - | - | - | Normal | 3 |
| H8 | F | 16 | Pancreas | Pancreas Tissue (Blank) | - | - | - | Normal | * |
| H9 | M | 35 | Pancreas | Pancreas Tissue | - | - | - | Normal | 2 |
| H10 | F | 21 | Pancreas | Pancreas Tissue | - | - | - | Normal | 2 |
