# Supplementary material for: Undermining Glutaminolysis Bolsters Chemotherapy While NRF2 Promotes Chemoresistance in KRAS-Driven Pancreatic Cancers
Source: Oxford University Press journal article supplement (doi:10.1158/0008-5472.can-19-1363), 2020-01-07
Supplement: 00085472can191363-sup-221481_3_supp_5990846_q3bd9g.docx [file 00085472can191363-sup-221481_3_supp_5990846_q3bd9g.docx]

| **A** | | | | | |
| --- | --- | --- | --- | --- | --- |
| **Gemcitabine IC50 Values** | | | | | |
| **BxPC-3** | **MIA PaCa-2** | **Capan-1** | **PANC-1** | **PK-1** | **SU-86.86** |
| 0.02 µM | 0.04 µM | 0.006 µM | 2.2 µM | 0.86 µM | 0.17 µM |

| **B** | | |
| --- | --- | --- |
| **PANC-1** |  | **PK-1** |
| IC50 Values: |  | IC50 Values: |
| scram shRNA + Gemcitabine = 1.41 μM |  | scram shRNA + Gemcitabine = 0.368 μM |
| shNRF2 # 7555 + Gemcitabine = 0.026 μM |  | shNRF2 # 7555 + Gemcitabine = 0.013 μM |
| shNRF2 # 7558 + Gemcitabine = 0.028 μM |  | shNRF2 # 7558 + Gemcitabine = 0.016 μM |

| **C** |
| --- |
| **PANC-1** |
| IC50 Values: |
| Vehicle + Gemcitabine = 1.83 μM |
| AI-1 + Gemcitabine = 24.01 μM |

| **D** | | |  |  |
| --- | --- | --- | --- | --- |
| **Capan-1** |  | **BxPC-3** |  | **MIA PaCa-2** |
| IC50 Values: |  | IC50 Values: |  | IC50 Values: |
| pLOC Control + Gemcitabine = 0.006 μM |  | pLOC-Control + Gemcitabine = 0.01 μM |  | pLenti 6.3 Control + Gemcitabine = 0.02 μM |
| pLOC-NRF2 + Gemcitabine = 0.142 μM |  | pLOC-NRF2 + Gemcitabine = 0.16 μM |  | pLenti 6.3-NRF2 + Gemcitabine = 0.54 μM |

| **E** | | |
| --- | --- | --- |
| **MIA PaCa-2** |  | **BxPC-3** |
| IC50 Values: |  | IC50 Values: |
| Vehicle + Gemcitabine = 0.040 μM |  | Vehicle + Gemcitabine = 0.02 μM |
| AI-1 + Gemcitabine = 0.999 μM |  | AI-1 + Gemcitabine = 0.68 μM |

| **F** |
| --- |
| **MIA PaCa-2** |
| IC50 Values: |
| scram shRNA + Gemcitabine = 0.034 μM |
| shNRF2 # 7555 + Gemcitabine = 0.001 μM |
| shNRF2 # 7558 + Gemcitabine = 0.002 μM |
